# Supplementary material for: Avocado Consumption and Risk of Cardiovascular Disease in US Adults
Source: PubMed Central journal article supplement — J Am Heart Assoc. 2022 Mar 30;11(7):e024014. doi: 10.1161/JAHA.121.024014 (PMC9075418; doi:10.1161/jaha.121.024014), 2022-03-30
Supplement: JAH3-11-e024014-s001.pdf [file JAH3-11-e024014-s001.pdf]

# **Supplemental Material**

**Table S1. Mean consumption\* of avocado and other fats in the Health Professionals Follow-Up Study (1986-2014) and Nurse's Health Study (1986-2010).**

| <b>Avocado</b>     |                           |                          | <b>Margarine</b> |                           |                          | <b>Mayonnaise</b>       |                           |                          |
|--------------------|---------------------------|--------------------------|------------------|---------------------------|--------------------------|-------------------------|---------------------------|--------------------------|
| <b>Year</b>        | <b>HPFS<br/>Mean ± SD</b> | <b>NHS<br/>Mean ± SD</b> | <b>Year</b>      | <b>HPFS<br/>Mean ± SD</b> | <b>NHS<br/>Mean ± SD</b> | <b>Year</b>             | <b>HPFS<br/>Mean ± SD</b> | <b>NHS<br/>Mean ± SD</b> |
| 1986               | 17.5 ± 46.2               | 9.1 ± 32.2               | 1986             | 72.1 ± 103.6              | 103.6 ± 121.1            | 1986                    | 35.7 ± 46.9               | 39.2 ± 44.1              |
| 1990               | --                        | --                       | 1990             | 76.3 ± 10.6.4             | 100.8 ± 119.0            | 1990                    | 31.5 ± 44.1               | 37.1 ± 46.2              |
| 1994               | 16.1 ± 45.5               | 8.4 ± 32.2               | 1994             | 69.3 ± 101.5              | 83.3 ± 109.9             | 1994                    | 34.3 ± 50.4               | 37.8 ± 48.3              |
| 1998               | 16.8 ± 51.1               | 8.4 ± 32.9               | 1998             | 59.5 ± 94.5               | 71.4 ± 105.0             | 1998                    | 34.3 ± 48.3               | 35.7 ± 46.2              |
| 2002               | 20.3 ± 62.3               | --                       | 2002             | 47.6 ± 88.2               | 63.7 ± 100.8             | 2002                    | 31.5 ± 48.3               | 34.3 ± 45.5              |
| 2006               | 24.5 ± 63.7               | 14.0 ± 47.6              | 2006             | 44.1 ± 84.7               | 58.8 ± 96.6              | 2006                    | 30.8 ± 48.3               | 32.9 ± 44.1              |
| 2010               | 27.3 ± 74.2               | 16.1 ± 51.1              | 2010             | 40.6 ± 81.2               | 35.7 ± 84.0              | 2010                    | 29.4 ± 47.6               | 32.2 ± 42.0              |
| 2014               | 32.2 ± 81.2               | --                       | 2014             | 39.2 ± 80.5               | --                       | 2014                    | 30.1 ± 49.0               | --                       |
| <b>Butter</b>      |                           |                          | <b>Olive Oil</b> |                           |                          | <b>Other Plant Oils</b> |                           |                          |
| <b>Year</b>        | <b>HPFS<br/>Mean ± SD</b> | <b>NHS<br/>Mean ± SD</b> | <b>Year</b>      | <b>HPFS<br/>Mean ± SD</b> | <b>NHS<br/>Mean ± SD</b> | <b>Year</b>             | <b>HPFS<br/>Mean ± SD</b> | <b>NHS<br/>Mean ± SD</b> |
| 1986               | 12.6 ± 25.9               | 13.3 ± 26.6              | 1986             | 0.0 ± 2.8                 | 0.0 ± 1.4                | 1986                    | 39.9 ± 31.5               | 38.5 ± 28.7              |
| 1990               | 10.5 ± 23.8               | 9.1 ± 22.4               | 1990             | 7.0 ± 16.1                | 7.7 ± 16.8               | 1990                    | 32.9 ± 29.4               | 32.9 ± 29.4              |
| 1994               | 10.5 ± 23.8               | 11.2 ± 23.1              | 1994             | 14.7 ± 33.6               | 17.5 ± 37.8              | 1994                    | 29.4 ± 30.1               | 23.8 ± 25.9              |
| 1998               | 12.6 ± 25.2               | 12.6 ± 25.2              | 1998             | 14.0 ± 30.8               | 24.5 ± 48.3              | 1998                    | 25.9 ± 28.0               | 23.8 ± 26.6              |
| 2002               | 14.0 ± 26.6               | 14.0 ± 25.9              | 2002             | 23.1 ± 46.9               | 28.0 ± 52.5              | 2002                    | 25.9 ± 27.3               | 28.7 ± 20.3              |
| 2006               | 13.3 ± 25.9               | 14.0 ± 25.2              | 2006             | 27.3 ± 53.9               | 27.3 ± 53.9              | 2006                    | 25.2 ± 28.0               | 23.1 ± 24.5              |
| 2010               | 12.6 ± 24.5               | 14.7 ± 25.2              | 2010             | 28.0 ± 51.8               | 27.3 ± 53.2              | 2010                    | 25.2 ± 28.0               | 24.5 ± 24.5              |
| 2014               | 13.3 ± 24.5               | --                       | 2014             | 28.7 ± 53.2               | --                       | 2014                    | 25.2 ± 28.0               | --                       |
| <b>Dairy Foods</b> |                           |                          | <b>Nuts</b>      |                           |                          | <b>Cheese</b>           |                           |                          |
| <b>Year</b>        | <b>HPFS<br/>Mean ± SD</b> | <b>NHS<br/>Mean ± SD</b> | <b>Year</b>      | <b>HPFS<br/>Mean ± SD</b> | <b>NHS<br/>Mean ± SD</b> | <b>Year</b>             | <b>HPFS<br/>Mean ± SD</b> | <b>NHS<br/>Mean ± SD</b> |
| 1986               | 101.5 ± 63.7              | 105.0 ± 58.8             | 1986             | 49.0 ± 79.8               | 29.4 ± 55.3              | 1986                    | 149.1 ± 155.4             | 184.8 ± 170.1            |
| 1990               | 84.7 ± 58.8               | 86.8 ± 51.8              | 1990             | 43.3 ± 73.5               | 23.1 ± 47.6              | 1990                    | 131.6 ± 144.2             | 149.8 ± 148.4            |
| 1994               | 77.7 ± 58.1               | 74.2 ± 51.8              | 1994             | 41.3 ± 72.8               | 21.0 ± 45.5              | 1994                    | 127.4 ± 144.2             | 136.5 ± 139.3            |
| 1998               | 74.2 ± 56.7               | 75.6 ± 53.2              | 1998             | 45.5 ± 80.5               | 24.5 ± 52.5              | 1998                    | 133.7 ± 155.4             | 144.2 ± 149.1            |
| 2002               | 79.8 ± 61.6               | 78.4 ± 55.3              | 2002             | 58.1 ± 101.5              | 37.1 ± 74.2              | 2002                    | 131.6 ± 162.4             | 141.4 ± 157.5            |
| 2006               | 82.6 ± 62.3               | 80.5 ± 56.7              | 2006             | 64.4 ± 106.4              | 51.8 ± 95.2              | 2006                    | 137.9 ± 169.4             | 149.1 ± 161.0            |
| 2010               | 84.0 ± 63.0               | 80.5 ± 56.7              | 2010             | 71.4 ± 119.0              | 50.4 ± 93.8              | 2010                    | 133.7 ± 162.4             | 144.2 ± 154.7            |
| 2014               | 86.1 ± 64.4               | --                       | 2014             | 74.9 ± 123.2              | 72.1 ± 124.6             | 2014                    | 136.5 ± 165.9             | --                       |
| <b>Egg</b>         |                           |                          | <b>Yogurt†</b>   |                           |                          | <b>Processed meats</b>  |                           |                          |
| <b>Year</b>        | <b>HPFS<br/>Mean ± SD</b> | <b>NHS<br/>Mean ± SD</b> | <b>Year</b>      | <b>HPFS<br/>Mean ± SD</b> | <b>NHS<br/>Mean ± SD</b> | <b>Year</b>             | <b>HPFS<br/>Mean ± SD</b> | <b>NHS<br/>Mean ± SD</b> |
| 1986               | 116.9 ± 145.6             | 105.7 ± 99.4             | 1986             | 146.3 ± 381.5             | 208.6 ± 415.8            | 1986                    | 76.3 ± 86.1               | 63.0 ± 48.3              |
| 1990               | 88.9 ± 123.2              | 72.8 ± 84.7              | 1990             | 143.5 ± 369.6             | 218.4 ± 425.6            | 1990                    | 64.4 ± 80.5               | 49.7 ± 58.8              |
| 1994               | 82.6 ± 118.3              | 67.9 ± 81.2              | 1994             | 147.7 ± 375.9             | 257.6 ± 487.9            | 1994                    | 59.5 ± 77.7               | 44.1 ± 56.7              |

|      |               |              |      |               |               |      |             |             |
|------|---------------|--------------|------|---------------|---------------|------|-------------|-------------|
| 1998 | 94.5 ± 133.0  | 83.3 ± 98.7  | 1998 | 180.6 ± 437.5 | 298.9 ± 543.2 | 1998 | 59.5 ± 76.3 | 59.5 ± 77.0 |
| 2002 | 101.5 ± 147.0 | 90.3 ± 107.8 | 2002 | 174.3 ± 441.7 | 277.2 ± 527.1 | 2002 | 62.3 ± 84.0 | 58.1 ± 76.3 |
| 2006 | 103.6 ± 149.8 | 91.0 ± 104.3 | 2006 | 196.7 ± 484.4 | 319.9 ± 557.2 | 2006 | 63.7 ± 85.4 | 57.4 ± 74.9 |
| 2010 | 102.9 ± 145.6 | 93.1 ± 107.1 | 2010 | 233.1 ± 552.3 | 388.5 ± 633.5 | 2010 | 62.3 ± 84.0 | 52.5 ± 67.9 |
| 2014 | 112.0 ± 156.8 | --           | 2014 | 259.0 ± 599.2 | --            | 2014 | 65.1 ± 87.5 | --          |

\* Consumption in grams/week for all foods listed.

† Includes plain, sweetened, and artificially sweetened yogurt.

**Table S2. Spearman correlations between avocado intake and other types of fat at the mid-point of follow-up (1998).**

|                                                         | Avocado | Margarine | Butter | Mayonnaise | Olive Oil | Other plant oils | Dairy foods | Cheese | Egg    | Yogurt* | Processed Meats | Nuts |
|---------------------------------------------------------|---------|-----------|--------|------------|-----------|------------------|-------------|--------|--------|---------|-----------------|------|
| <b>Health Professionals Follow-up Study<sup>†</sup></b> |         |           |        |            |           |                  |             |        |        |         |                 |      |
| <b>Avocado</b>                                          | 1.0     | -0.04     | 0.09   | 0.09       | 0.10      | 0.08             | 0.06        | 0.08   | 0.08   | 0.10    | 0.01            | 0.11 |
| <b>Margarine</b>                                        | -0.04   | 1.0       | -0.14  | 0.20       | -0.11     | 0.18             | 0.10        | 0.14   | 0.10   | -0.06   | 0.18            | 0.05 |
| <b>Butter</b>                                           | 0.09    | -0.14     | 1.0    | 0.10       | 0.12      | 0.08             | 0.42        | 0.13   | 0.22   | 0.002   | 0.21            | 0.08 |
| <b>Mayonnaise</b>                                       | 0.09    | 0.20      | 0.10   | 1.0        | 0.04      | 0.55             | 0.17        | 0.19   | 0.17   | -0.004  | 0.22            | 0.10 |
| <b>Olive Oil</b>                                        | 0.10    | -0.11     | 0.12   | 0.04       | 1.0       | -0.17            | -0.002      | 0.02   | -0.02  | 0.12    | -0.11           | 0.16 |
| <b>Other plant oils</b>                                 | 0.08    | 0.18      | 0.08   | 0.55       | -0.17     | 1.0              | 0.23        | 0.15   | 0.18   | -0.08   | 0.27            | 0.13 |
| <b>Dairy foods</b>                                      | 0.06    | 0.10      | 0.42   | 0.17       | -0.002    | 0.23             | 1.0         | 0.52   | 0.28   | 0.05    | 0.35            | 0.11 |
| <b>Cheese</b>                                           | 0.08    | 0.14      | 0.13   | 0.19       | 0.02      | 0.15             | 0.52        | 1.0    | 0.22   | 0.10    | 0.22            | 0.11 |
| <b>Egg</b>                                              | 0.08    | 0.10      | 0.22   | 0.17       | -0.02     | 0.18             | 0.28        | 0.22   | 1.0    | -0.03   | 0.40            | 0.05 |
| <b>Yogurt*</b>                                          | 0.10    | -0.06     | 0.002  | -0.004     | 0.12      | -0.08            | 0.05        | 0.10   | -0.03  | 1.0     | -0.15           | 0.06 |
| <b>Processed meats</b>                                  | 0.01    | 0.18      | 0.21   | 0.22       | -0.11     | 0.27             | 0.35        | 0.22   | 0.40   | -0.15   | 1.0             | 0.06 |
| <b>Nuts</b>                                             | 0.11    | 0.05      | 0.08   | 0.10       | 0.16      | 0.13             | 0.11        | 0.11   | 0.05   | 0.06    | 0.06            | 1.0  |
| <b>Nurses' Health Study<sup>‡</sup></b>                 |         |           |        |            |           |                  |             |        |        |         |                 |      |
| <b>Avocado</b>                                          | 1.0     | 0.03      | -0.03  | 0.01       | -0.10     | 0.11             | 0.07        | 0.04   | 0.06   | 0.06    | -0.03           | 0.14 |
| <b>Margarine</b>                                        | 0.03    | 1.0       | -0.28  | 0.14       | -0.12     | 0.15             | 0.02        | 0.09   | 0.09   | -0.06   | 0.13            | 0.02 |
| <b>Butter</b>                                           | -0.03   | -0.28     | 1.0    | 0.08       | 0.19      | 0.10             | 0.44        | 0.07   | 0.15   | -0.01   | 0.16            | 0.06 |
| <b>Mayonnaise</b>                                       | 0.01    | 0.14      | 0.08   | 1.0        | 0.08      | 0.51             | 0.16        | 0.17   | 0.18   | 0.02    | 0.18            | 0.10 |
| <b>Olive Oil</b>                                        | -0.10   | -0.12     | 0.19   | 0.08       | 1.0       | -0.16            | -0.02       | 0.03   | -0.001 | 0.18    | -0.10           | 0.16 |
| <b>Other plant oils</b>                                 | 0.11    | 0.15      | 0.10   | 0.51       | -0.16     | 1.0              | 0.29        | 0.14   | 0.19   | -0.11   | 0.27            | 0.13 |
| <b>Dairy foods</b>                                      | 0.07    | 0.02      | 0.44   | 0.16       | -0.02     | 0.29             | 1.0         | 0.49   | 0.26   | 0.08    | 0.32            | 0.12 |
| <b>Cheese</b>                                           | 0.04    | 0.09      | 0.07   | 0.17       | 0.03      | 0.14             | 0.49        | 1.0    | 0.21   | 0.14    | 0.16            | 0.12 |
| <b>Egg</b>                                              | 0.06    | 0.09      | 0.15   | 0.18       | -0.001    | 0.19             | 0.26        | 0.21   | 1.0    | -0.09   | 0.33            | 0.05 |
| <b>Yogurt*</b>                                          | 0.06    | -0.06     | -0.01  | 0.02       | 0.18      | -0.11            | 0.08        | 0.14   | -0.09  | 1.0     | -0.15           | 0.09 |
| <b>Processed meats</b>                                  | -0.03   | 0.13      | 0.16   | 0.18       | -0.10     | 0.27             | 0.32        | 0.16   | 0.33   | -0.15   | 1.0             | 0.05 |
| <b>Nuts</b>                                             | 0.14    | 0.02      | 0.06   | 0.10       | 0.16      | 0.13             | 0.12        | 0.12   | 0.05   | 0.09    | 0.05            | 1.0  |

\* Includes plain, sweetened, and artificially sweetened yogurt.

<sup>†</sup>All correlations = 0.02, p-value <0.001; all correlations ≥ 0.03, p-value <0.0001.

<sup>‡</sup>All correlations = 0.01, p-value <0.001; all correlations ≥ 0.02, p-value <0.0001.

**Table S3. Risk of Cardiovascular Events According to Categories of Avocado Intake\* without adjusting for BMI in Two Large US Cohorts.**

|                                             | HR (95% CI)                    |                   |                   |                   | P value for trend | HR (95% CI) for 1/2 serving (1/4 avocado)-Increase in Avocado Intake per day |
|---------------------------------------------|--------------------------------|-------------------|-------------------|-------------------|-------------------|------------------------------------------------------------------------------|
|                                             | Never or less than 1 per month | 1-3 per month     | 1 per week        | ≥2 per week       |                   |                                                                              |
| <b>CVD†</b>                                 |                                |                   |                   |                   |                   |                                                                              |
| <b>Health Professionals Follow-Up Study</b> |                                |                   |                   |                   |                   |                                                                              |
| No. cases/person-years                      | 5,076/702,080                  | 1,117/176,523     | 282/49,201        | 186/27,947        |                   |                                                                              |
| Multivariable Model 3                       | 1.00                           | 0.93 (0.87, 0.99) | 0.84 (0.75, 0.95) | 0.82 (0.71, 0.95) | 0.0005            | 0.75 (0.63, 0.88)                                                            |
| Multivariable Model 3 without BMI           | 1.00                           | 0.92 (0.86, 0.99) | 0.84 (0.74, 0.95) | 0.82 (0.71, 0.95) | 0.0004            | 0.74 (0.63, 0.87)                                                            |
| <b>Nurses' Health Study I</b>               |                                |                   |                   |                   |                   |                                                                              |
| No. cases/person-years                      | 6,407/1,473,683                | 831/212,466       | 257/60,263        | 118/28,780        |                   |                                                                              |
| Multivariable Model 3                       | 1.00                           | 0.98 (0.91, 1.06) | 1.01 (0.89, 1.15) | 0.88 (0.73, 1.06) | 0.24              | 0.89 (0.73, 1.08)                                                            |
| Multivariable Model 3 without BMI           | 1.00                           | 0.98 (0.91, 1.05) | 1.01 (0.89, 1.15) | 0.88 (0.73, 1.06) | 0.22              | 0.89 (0.73, 1.07)                                                            |
| <b>Pooled</b>                               |                                |                   |                   |                   |                   |                                                                              |
| Multivariable Model 3                       | 1.00                           | 0.95 (0.90, 1.00) | 0.92 (0.84, 1.01) | 0.84 (0.75, 0.95) | 0.0007            | 0.80 (0.71, 0.91)                                                            |
| Multivariable Model 3 without BMI           | 1.00                           | 0.95 (0.90, 1.00) | 0.92 (0.84, 1.00) | 0.84 (0.75, 0.95) | 0.0005            | 0.80 (0.71, 0.91)                                                            |
| <b>CHD‡</b>                                 |                                |                   |                   |                   |                   |                                                                              |
| <b>Health Professionals Follow-Up Study</b> |                                |                   |                   |                   |                   |                                                                              |
| No. cases/person-years                      | 3,872/703,191                  | 843/176,758       | 203/49,258        | 135/27,993        |                   |                                                                              |
| Multivariable Model 3                       | 1.00                           | 0.92 (0.85, 0.99) | 0.81 (0.70, 0.93) | 0.79 (0.66, 0.94) | 0.0004            | 0.70 (0.58, 0.85)                                                            |
| Multivariable Model 3 without BMI           | 1.00                           | 0.91 (0.85, 0.99) | 0.80 (0.70, 0.93) | 0.79 (0.66, 0.94) | 0.0003            | 0.70 (0.57, 0.85)                                                            |
| <b>Nurses' Health Study I</b>               |                                |                   |                   |                   |                   |                                                                              |
| No. cases/person-years                      | 3,530/1,475,581                | 436/212,727       | 114/60,357        | 52/28,818         |                   |                                                                              |
| Multivariable Model 3                       | 1.00                           | 0.97 (0.88, 1.08) | 0.88 (0.72, 1.06) | 0.79 (0.60, 1.04) | 0.04              | 0.74 (0.55, 0.98)                                                            |
| Multivariable Model 3 without BMI           | 1.00                           | 0.97 (0.87, 1.07) | 0.87 (0.72, 1.05) | 0.78 (0.59, 1.03) | 0.03              | 0.73 (0.55, 0.97)                                                            |
| <b>Pooled</b>                               |                                |                   |                   |                   |                   |                                                                              |
| Multivariable Model 3                       | 1.00                           | 0.94 (0.88, 1.00) | 0.83 (0.74, 0.93) | 0.79 (0.68, 0.91) | <0.0001           | 0.71 (0.61, 0.84)                                                            |
| Multivariable Model 3 without BMI           | 1.00                           | 0.93 (0.88, 0.99) | 0.83 (0.74, 0.93) | 0.79 (0.68, 0.91) | <0.0001           | 0.71 (0.60, 0.83)                                                            |
| <b>Stroke§</b>                              |                                |                   |                   |                   |                   |                                                                              |
| <b>Health Professionals Follow-Up Study</b> |                                |                   |                   |                   |                   |                                                                              |
| No. cases/person-years                      | 1,204/704,059                  | 274/176,971       | 79/49,317         | 51/27,999         |                   |                                                                              |
| Multivariable Model 3                       | 1.00                           | 0.96 (0.84, 1.10) | 0.95 (0.76, 1.21) | 0.91 (0.69, 1.22) | 0.45              | 0.89 (0.64, 1.22)                                                            |
| Multivariable Model 3 without BMI           | 1.00                           | 0.96 (0.83, 1.10) | 0.95 (0.75, 1.20) | 0.91 (0.68, 1.21) | 0.43              | 0.88 (0.64, 1.21)                                                            |
| <b>Nurses' Health Study I</b>               |                                |                   |                   |                   |                   |                                                                              |
| No. cases/person-years                      | 3,046/1,475,539                | 421/212,662       | 147/60,321        | 68/28,802         |                   |                                                                              |
| Multivariable Model 3                       | 1.00                           | 1.00 (0.90, 1.11) | 1.13 (0.96, 1.34) | 0.97 (0.76, 1.24) | 0.81              | 1.03 (0.80, 1.33)                                                            |
| Multivariable Model 3 without BMI           | 1.00                           | 1.00 (0.90, 1.11) | 1.13 (0.96, 1.34) | 0.97 (0.76, 1.24) | 0.81              | 1.03 (0.80, 1.33)                                                            |
| <b>Pooled</b>                               |                                |                   |                   |                   |                   |                                                                              |
| Multivariable Model 3                       | 1.00                           | 0.98 (0.90, 1.07) | 1.07 (0.93, 1.23) | 0.94 (0.78, 1.14) | 0.78              | 0.97 (0.80, 1.19)                                                            |
| Multivariable Model 3 without BMI           | 1.00                           | 0.98 (0.90, 1.07) | 1.07 (0.93, 1.22) | 0.94 (0.78, 1.14) | 0.76              | 0.97 (0.79, 1.18)                                                            |

\* 1 serving avocado = ½ avocado; ½ serving = ¼ avocado. † CVD = cardiovascular disease: Fatal and nonfatal myocardial infarction plus fatal and nonfatal stroke. ‡ CHD = coronary heart disease: Fatal and nonfatal myocardial infarction. § Fatal and nonfatal stroke.

BMI, body mass index.

Model 3 was adjusted for: age (years); race (White or other [Black, American Indian or Alaskan Native, Asian, Native Hawaiian or Other Pacific Islander]); ancestry (Southern European/Mediterranean, other Caucasian/Scandinavian, other); alcohol intake (0, 0.1 to 4.9, 5.0 to 9.9, 10.0 to 14.9, and  $\geq 15.0$  g/day); smoking status (never, former, current smoker 1 to 14 cigarettes per day, 15 to 24 cigarettes per day; or  $\geq 25$  cigarettes per day); physical activity (<3.0, 3.0 to 8.9, 9.0 to 17.9, 18.0 to 26.9,  $\geq 27.0$  MET-h/week); family history of diabetes (yes, no); family history of myocardial infarction (yes, no); family history of cancer (yes, no); baseline diabetes mellitus (yes, no); baseline hypertension or antihypertensive medication use (yes, no); baseline hypercholesterolemia or cholesterol-lowering medication use (yes, no); multivitamin use (yes, no); aspirin use (yes, no); in women, postmenopausal status and menopausal hormone use (premenopausal, postmenopausal [no, past, or current hormone use]); total energy intake (kcal/day); and body mass index (kg/m<sup>2</sup>, continuous), and red and processed meat, fruits and vegetables (excluding avocado), nuts, soda (caloric and low or noncaloric), whole grains, eggs, tortilla (whole and chips), breads, cheese intakes (all in quintiles; tortilla in tertiles in NHS), and trans-fat.

**Table S4. Risk of Cardiovascular Events According to Avocado Intake\* Mutually Adjusting for Other Fats<sup>†</sup> in Two Large US Cohorts.**

|                                                                                      | P value for trend | HR (95% CI) for 1/2 serving (1/4 avocado)-Increase in Avocado Intake per day |
|--------------------------------------------------------------------------------------|-------------------|------------------------------------------------------------------------------|
| <b>CVD<sup>‡</sup></b>                                                               |                   |                                                                              |
| <b>Health Professionals Follow-Up Study</b>                                          |                   |                                                                              |
| Multivariable Model 3                                                                | 0.0005            | 0.75 (0.63, 0.88)                                                            |
| Multivariable Model 3, mutually-adjusted for other fat-containing foods <sup>†</sup> | 0.01              | 0.85 (0.74, 0.97)                                                            |
| <b>Nurses' Health Study I</b>                                                        |                   |                                                                              |
| Multivariable Model 3                                                                | 0.24              | 0.89 (0.73, 1.08)                                                            |
| Multivariable Model 3, mutually-adjusted for other fat-containing foods <sup>†</sup> | 0.60              | 0.96 (0.81, 1.13)                                                            |
| <b>Pooled</b>                                                                        |                   |                                                                              |
| Multivariable Model 3                                                                | 0.0007            | 0.80 (0.71, 0.91)                                                            |
| Multivariable Model 3, mutually-adjusted for other fat-containing foods <sup>†</sup> | 0.02              | 0.89 (0.80, 0.98)                                                            |
| <b>CHD<sup>§</sup></b>                                                               |                   |                                                                              |
| <b>Health Professionals Follow-Up Study</b>                                          |                   |                                                                              |
| Multivariable Model 3                                                                | 0.0004            | 0.70 (0.58, 0.85)                                                            |
| Multivariable Model 3, mutually-adjusted for other fat-containing foods <sup>†</sup> | 0.002             | 0.78 (0.66, 0.91)                                                            |
| <b>Nurses' Health Study I</b>                                                        |                   |                                                                              |
| Multivariable Model 3                                                                | 0.04              | 0.74 (0.55, 0.98)                                                            |
| Multivariable Model 3, mutually-adjusted for other fat-containing foods <sup>†</sup> | 0.13              | 0.82 (0.63, 1.06)                                                            |
| <b>Pooled</b>                                                                        |                   |                                                                              |
| Multivariable Model 3                                                                | <0.0001           | 0.71 (0.61, 0.84)                                                            |
| Multivariable Model 3, mutually-adjusted for other fat-containing foods <sup>†</sup> | 0.0007            | 0.79 (0.69, 0.90)                                                            |
| <b>Stroke<sup>¶</sup></b>                                                            |                   |                                                                              |
| <b>Health Professionals Follow-Up Study</b>                                          |                   |                                                                              |
| Multivariable Model 3                                                                | 0.45              | 0.89 (0.64, 1.22)                                                            |
| Multivariable Model 3, mutually-adjusted for other fat-containing foods <sup>†</sup> | 0.80              | 1.03 (0.84, 1.25)                                                            |
| <b>Nurses' Health Study I</b>                                                        |                   |                                                                              |
| Multivariable Model 3                                                                | 0.81              | 1.03 (0.80, 1.33)                                                            |
| Multivariable Model 3, mutually-adjusted for other fat-containing foods <sup>†</sup> | 0.54              | 1.07 (0.86, 1.33)                                                            |
| <b>Pooled</b>                                                                        |                   |                                                                              |
| Multivariable Model 3                                                                | 0.78              | 0.97 (0.80, 1.19)                                                            |
| Multivariable Model 3, mutually-adjusted for other fat-containing foods <sup>†</sup> | 0.55              | 1.05 (0.90, 1.21)                                                            |

\* 1 serving avocado = 1/2 avocado; 1/2 serving = 1/4 avocado. <sup>†</sup> Mutually-adjusted for other fat-containing foods includes the following variables: margarine, mayonnaise, olive oil, all other plant oils, and dairy foods. <sup>‡</sup> CVD = cardiovascular disease: Fatal and nonfatal myocardial infarction plus fatal and nonfatal stroke. <sup>§</sup> CHD = coronary heart disease: Fatal and nonfatal myocardial infarction. <sup>¶</sup> Fatal and nonfatal stroke.

Model 3 was adjusted for: age (years); race (White or other [Black, American Indian or Alaskan Native, Asian, Native Hawaiian or Other Pacific Islander]); ancestry (Southern European/Mediterranean, other Caucasian/Scandinavian, other); alcohol intake (0, 0.1 to 4.9, 5.0 to 9.9, 10.0 to 14.9, and ≥15.0 g/day); smoking status (never, former, current smoker 1 to 14 cigarettes per day, 15 to 24 cigarettes per day; or ≥25 cigarettes per day); physical activity (<3.0, 3.0 to 8.9, 9.0 to 17.9, 18.0 to 26.9, ≥27.0 MET-h/week); family history of diabetes (yes, no); family history of myocardial infarction (yes, no); family history of cancer (yes, no); baseline diabetes mellitus (yes, no); baseline hypertension or antihypertensive medication use (yes, no); baseline hypercholesterolemia or cholesterol-lowering medication use (yes, no); multivitamin use (yes, no); aspirin use (yes, no); in women, postmenopausal status and menopausal hormone use (premenopausal, postmenopausal [no, past, or current hormone use]); total energy intake (kcal/day); body mass index (kg/m<sup>2</sup>, continuous), red and processed meat, fruits and vegetables (excluding avocado), nuts, soda (caloric and low or noncaloric), whole grains, eggs, tortilla (whole and chips), breads, cheese intakes (all in quintiles; tortilla in tertiles in NHS), and trans-fat.

**Table S5. Risk of Stroke Sub-type According to Simple Update Categories of Avocado Intake\* in Two Large US Cohorts.**

|                                             | HR (95% CI)                    |                   |                   |                   | P value for trend | HR (95% CI) for 1/2 serving (1/4 avocado)-Increase in Avocado Intake per day |
|---------------------------------------------|--------------------------------|-------------------|-------------------|-------------------|-------------------|------------------------------------------------------------------------------|
|                                             | Never or less than 1 per month | 1-3 per month     | 1 per week        | ≥2 per week       |                   |                                                                              |
| <b>Ischemic stroke<sup>†</sup></b>          |                                |                   |                   |                   |                   |                                                                              |
| <b>Health Professionals Follow-Up Study</b> |                                |                   |                   |                   |                   |                                                                              |
| No. cases/person-years                      | 628/704,059                    | 147/176,971       | 44/49,317         | 29/27,999         |                   |                                                                              |
| Age-adjusted Model 1                        | 1.00                           | 1.01 (0.84, 1.21) | 1.01 (0.74, 1.37) | 1.08 (0.74, 1.58) | 0.69              | 1.09 (0.72, 1.64)                                                            |
| Multivariable Model 2                       | 1.00                           | 1.01 (0.84, 1.21) | 1.01 (0.74, 1.38) | 1.10 (0.76, 1.61) | 0.63              | 1.11 (0.73, 1.68)                                                            |
| Multivariable Model 3                       | 1.00                           | 0.96 (0.80, 1.16) | 0.95 (0.69, 1.31) | 1.00 (0.68, 1.47) | 0.91              | 0.98 (0.63, 1.50)                                                            |
| <b>Nurses' Health Study I</b>               |                                |                   |                   |                   |                   |                                                                              |
| No. cases/person-years                      | 1,385/1,475,539                | 187/212,662       | 58/60,321         | 24/28,802         |                   |                                                                              |
| Age-adjusted Model 1                        | 1.00                           | 0.97 (0.83, 1.13) | 1.02 (0.78, 1.33) | 0.84 (0.56, 1.26) | 0.43              | 0.85 (0.57, 1.27)                                                            |
| Multivariable Model 2                       | 1.00                           | 1.00 (0.86, 1.17) | 1.07 (0.82, 1.39) | 0.90 (0.60, 1.35) | 0.81              | 0.95 (0.63, 1.43)                                                            |
| Multivariable Model 3                       | 1.00                           | 0.97 (0.83, 1.14) | 1.03 (0.79, 1.35) | 0.87 (0.58, 1.31) | 0.56              | 0.88 (0.58, 1.34)                                                            |
| <b>Pooled</b>                               |                                |                   |                   |                   |                   |                                                                              |
| Age-adjusted Model 1                        | 1.00                           | 0.99 (0.88, 1.11) | 1.02 (0.83, 1.24) | 0.96 (0.73, 1.27) | 0.78              | 0.96 (0.72, 1.28)                                                            |
| Multivariable Model 2                       | 1.00                           | 1.00 (0.89, 1.13) | 1.05 (0.85, 1.28) | 1.00 (0.76, 1.32) | 0.87              | 1.03 (0.77, 1.37)                                                            |
| Multivariable Model 3                       | 1.00                           | 0.97 (0.85, 1.09) | 1.00 (0.81, 1.23) | 0.94 (0.71, 1.24) | 0.62              | 0.93 (0.69, 1.25)                                                            |
| <b>Hemorrhagic stroke<sup>‡</sup></b>       |                                |                   |                   |                   |                   |                                                                              |
| <b>Health Professionals Follow-Up Study</b> |                                |                   |                   |                   |                   |                                                                              |
| No. cases/person-years                      | 187/704,059                    | 40/176,971        | 12/49,317         | 7/27,999          |                   |                                                                              |
| Age-adjusted Model 1                        | 1.00                           | 0.93 (0.66, 1.32) | 0.96 (0.53, 1.73) | 0.88 (0.41, 1.89) | 0.69              | 0.85 (0.37, 1.93)                                                            |
| Multivariable Model 2                       | 1.00                           | 0.96 (0.68, 1.36) | 1.02 (0.56, 1.84) | 0.93 (0.43, 1.98) | 0.84              | 0.92 (0.41, 2.09)                                                            |
| Multivariable Model 3                       | 1.00                           | 0.89 (0.63, 1.28) | 0.91 (0.50, 1.67) | 0.83 (0.38, 1.79) | 0.54              | 0.77 (0.33, 1.81)                                                            |
| <b>Nurses' Health Study I</b>               |                                |                   |                   |                   |                   |                                                                              |
| No. cases/person-years                      | 385/1,475,539                  | 58/212,662        | 18/60,321         | 9/28,802          |                   |                                                                              |
| Age-adjusted Model 1                        | 1.00                           | 1.09 (0.82, 1.43) | 1.16 (0.72, 1.87) | 1.18 (0.61, 2.28) | 0.43              | 1.31 (0.67, 2.57)                                                            |
| Multivariable Model 2                       | 1.00                           | 1.12 (0.84, 1.48) | 1.20 (0.75, 1.94) | 1.21 (0.62, 2.35) | 0.35              | 1.38 (0.70, 2.72)                                                            |
| Multivariable Model 3                       | 1.00                           | 1.00 (0.75, 1.34) | 1.07 (0.66, 1.74) | 1.06 (0.54, 2.09) | 0.80              | 1.10 (0.54, 2.24)                                                            |
| <b>Pooled</b>                               |                                |                   |                   |                   |                   |                                                                              |
| Age-adjusted Model 1                        | 1.00                           | 1.02 (0.83, 1.27) | 1.08 (0.75, 1.56) | 1.04 (0.63, 1.71) | 0.72              | 1.10 (0.65, 1.85)                                                            |
| Multivariable Model 2                       | 1.00                           | 1.05 (0.85, 1.31) | 1.13 (0.78, 1.63) | 1.08 (0.65, 1.78) | 0.55              | 1.17 (0.70, 1.98)                                                            |
| Multivariable Model 3                       | 1.00                           | 0.96 (0.76, 1.20) | 1.01 (0.69, 1.47) | 0.95 (0.57, 1.58) | 0.85              | 0.95 (0.55, 1.64)                                                            |

\* 1 serving avocado = 1/2 avocado; 1/2 serving = 1/4 avocado. <sup>†</sup> Thrombotic or embolic occlusion of a cerebral artery. <sup>‡</sup> Subarachnoid and intraparenchymal hemorrhage.

Model 2 was adjusted for: age (years); race (White or other [Black, American Indian or Alaskan Native, Asian, Native Hawaiian or Other Pacific Islander]); ancestry (Southern European/Mediterranean, other Caucasian/Scandinavian, other); alcohol intake (0, 0.1 to 4.9, 5.0 to 9.9, 10.0 to 14.9, and ≥15.0 g/day); smoking status (never, former, current smoker 1 to 14 cigarettes per day, 15 to 24 cigarettes per day; or ≥25 cigarettes per day); physical activity (<3.0, 3.0 to 8.9, 9.0 to 17.9, 18.0 to 26.9, ≥27.0 MET-h/week); family history of diabetes (yes, no); family history of myocardial infarction (yes, no); family history of cancer (yes, no); baseline diabetes mellitus (yes, no); baseline hypertension or antihypertensive medication use (yes, no); baseline hypercholesterolemia or cholesterol-lowering medication use (yes, no); multivitamin use (yes, no); aspirin use (yes, no); in women, postmenopausal status and menopausal hormone use (premenopausal, postmenopausal [no, past, or current hormone use]); total energy intake (kcal/day); and BMI kg/m<sup>2</sup>. Model 3 was additionally



adjusted for red and processed meat, fruits and vegetables (excluding avocado), nuts, soda (caloric and low or noncaloric), whole grains, eggs, tortilla (whole and chips), breads, cheese intakes (in quintiles; tortilla in tertiles in NHS), and trans-fat. Results were pooled with the use of the fixed-effects model.

**Table S6. Subgroup Analyses for Risk of Coronary Heart Disease and Stroke According to Avocado Intake\*.**

| CHD <sup>†</sup>                               |                             |                         | Stroke <sup>‡</sup>                            |                             |                         |
|------------------------------------------------|-----------------------------|-------------------------|------------------------------------------------|-----------------------------|-------------------------|
|                                                | Pooled Adjusted HR (95% CI) | p Value for Interaction |                                                | Pooled Adjusted HR (95% CI) | p Value for Interaction |
| <b>Sex</b>                                     |                             |                         | <b>Sex</b>                                     |                             |                         |
| Women, n=4,132 <sup>§</sup>                    | 0.74 (0.55, 0.98)           | 0.78                    | Women, n=3,682 <sup>§</sup>                    | 1.03 (0.80, 1.33)           | 0.46                    |
| Men, n=5,053                                   | 0.70 (0.58, 0.85)           |                         | Men, n=1,608                                   | 0.89 (0.64, 1.22)           |                         |
| <b>Age, years</b>                              |                             |                         | <b>Age, years</b>                              |                             |                         |
| <65, n=2,484                                   | 0.92 (0.66, 1.30)           | 0.08                    | <65, n=1,073                                   | 1.04 (0.62, 1.74)           | 0.77                    |
| ≥65, n=6,701                                   | 0.69 (0.57, 0.82)           |                         | ≥65, n=4,217                                   | 0.97 (0.78, 1.21)           |                         |
| <b>BMI, kg/m<sup>2</sup></b>                   |                             |                         | <b>BMI, kg/m<sup>2</sup></b>                   |                             |                         |
| <25, n=4,744                                   | 0.76 (0.62, 0.94)           | 0.55                    | <25, n=2,685                                   | 0.87 (0.66, 1.13)           | 0.19                    |
| ≥25, n=4,441                                   | 0.67 (0.52, 0.87)           |                         | ≥25, n=2,605                                   | 1.14 (0.85, 1.54)           |                         |
| <b>Ancestry</b>                                |                             |                         | <b>Ancestry</b>                                |                             |                         |
| Mediterranean and Other Caucasian, n=8,287     | 0.74 (0.63, 0.87)           | 0.03                    | Mediterranean and Other Caucasian, n=4,597     | 0.95 (0.77, 1.17)           | 0.90                    |
| All Other, including Hispanic, n=898           | 0.37 (0.18, 0.76)           |                         | All Other, including Hispanic, n=693           | 1.15 (0.62, 2.11)           |                         |
| <b>Family history of myocardial infarction</b> |                             |                         | <b>Family history of myocardial infarction</b> |                             |                         |
| No, n=5,212                                    | 0.69 (0.56, 0.85)           | 0.73                    | No, n=3,111                                    | 0.85 (0.66, 1.11)           | 0.28                    |
| Yes, n=3,973                                   | 0.75 (0.59, 0.97)           |                         | Yes, n=2,179                                   | 1.20 (0.88, 1.64)           |                         |
| <b>AHEI</b>                                    |                             |                         | <b>AHEI</b>                                    |                             |                         |
| Below median, n=5,032                          | 0.78 (0.60, 1.02)           | 0.24                    | Below median, n=2,632                          | 1.04 (0.72, 1.50)           | 0.82                    |
| Above median, n=4,153                          | 0.71 (0.58, 0.88)           |                         | Above median, n=2,658                          | 0.96 (0.76, 1.22)           |                         |
| <b>Total fruit intake</b>                      |                             |                         | <b>Total fruit intake</b>                      |                             |                         |
| Below median, n=4,117                          | 0.65 (0.49, 0.87)           | 0.53                    | Below median, n=2,445                          | 1.00 (0.72, 1.40)           | 0.91                    |
| Above median, n=5,068                          | 0.76 (0.63, 0.92)           |                         | Above median, n=2,845                          | 0.98 (0.77, 1.26)           |                         |
| <b>Total vegetable intake</b>                  |                             |                         | <b>Total vegetable intake</b>                  |                             |                         |
| Below median, n=4,456                          | 0.79 (0.60, 1.06)           | 0.39                    | Below median, n=2,414                          | 0.67 (0.43, 1.02)           | 0.09                    |
| Above median, n=4,729                          | 0.71 (0.58, 0.86)           |                         | Above median, n=2,876                          | 1.15 (0.92, 1.44)           |                         |
| <b>Green vegetable intake</b>                  |                             |                         | <b>Green vegetable intake</b>                  |                             |                         |
| Below median, n=4,901                          | 0.73 (0.56, 0.95)           | 0.57                    | Below median, n=2,857                          | 0.85 (0.60, 1.19)           | 0.64                    |
| Above median, n=4,284                          | 0.73 (0.60, 0.90)           |                         | Above median, n=2,433                          | 1.05 (0.82, 1.35)           |                         |
| <b>Lettuce vegetable intake</b>                |                             |                         | <b>Lettuce vegetable intake</b>                |                             |                         |
| Below median, n=4,909                          | 0.76 (0.59, 0.97)           | 0.38                    | Below median, n=2,781                          | 0.86 (0.62, 1.19)           | 0.79                    |
| Above median, n=4,276                          | 0.70 (0.56, 0.86)           |                         | Above median, n=2,509                          | 1.07 (0.83, 1.39)           |                         |

\* 1 serving avocado = ½ avocado; ½ serving = ¼ avocado. <sup>†</sup> CHD = coronary heart disease: Fatal and nonfatal myocardial infarction. <sup>‡</sup> Fatal and nonfatal stroke. <sup>§</sup> n= number of cases per subgroup. HRs for ½ a serving/day (1/4 avocado) increase in avocado intake in each subgroup category. Multivariable model was adjusted for the following: age (years); race (White or other [Black, American Indian or Alaskan Native, Asian, Native Hawaiian or Other Pacific Islander]); ancestry (Southern European/Mediterranean, other Caucasian/Scandinavian, other); alcohol intake (0, 0.1 to 4.9, 5.0 to 9.9, 10.0 to 14.9, and ≥15.0 g/day); smoking status (never, former, current smoker 1 to 14 cigarettes per day, 15 to 24 cigarettes per day; or ≥2 cigarettes per day); physical activity (<3.0, 3.0 to 8.9, 9.0 to 17.9, 18.0 to 26.9, ≥27.0 MET-h/week); family history of diabetes (yes, no); family history of myocardial infarction (yes, no); family history of cancer (yes, no); baseline diabetes mellitus (yes, no); baseline hypertension or antihypertensive medication use (yes, no); baseline hypercholesterolemia or cholesterol-lowering medication use (yes, no); multivitamin use (yes, no); aspirin use (yes, no); postmenopausal status and menopausal hormone use (premenopausal, postmenopausal [no, past, or current hormone use], in women only); total energy intake (kcal/day); body mass index (kg/m<sup>2</sup>, continuous); red and processed meat, fruits and vegetables (excluding avocado), nuts, soda (caloric and low or noncaloric), whole grains, eggs, tortilla (whole and chips), breads, cheese intakes (all in quintiles; tortilla in tertiles in NHS); and trans-fat, except the stratified factor. AHEI = Alternative Healthy Eating Index score.

**Table S7. Risk of Cardiovascular Events According to Categories of Avocado Intake\* without Stop Updating Diet for Chronic Disease Diagnosis in Two Large US Cohorts.**

|                                             | HR (95% CI)                    |                   |                   |                   | P value for trend | HR (95% CI) for 1/2 serving (1/4 avocado)-Increase in Avocado Intake per day |
|---------------------------------------------|--------------------------------|-------------------|-------------------|-------------------|-------------------|------------------------------------------------------------------------------|
|                                             | Never or less than 1 per month | 1-3 per month     | 1 per week        | ≥2 per week       |                   |                                                                              |
| <b>CVD†</b>                                 |                                |                   |                   |                   |                   |                                                                              |
| <b>Health Professionals Follow-Up Study</b> |                                |                   |                   |                   |                   |                                                                              |
| No. cases/person-years                      | 5,076/702,080                  | 1,117/176,523     | 282/49,201        | 186/27,947        |                   |                                                                              |
| Age-adjusted Model 1                        | 1.00                           | 0.91 (0.85, 0.98) | 0.84 (0.74, 0.94) | 0.81 (0.71, 0.94) | <0.0001           | 0.73 (0.63, 0.86)                                                            |
| Multivariable Model 2                       | 1.00                           | 0.97 (0.91, 1.04) | 0.93 (0.83, 1.05) | 0.89 (0.77, 1.02) | 0.05              | 0.86 (0.74, 1.00)                                                            |
| Multivariable Model 3                       | 1.00                           | 0.96 (0.89, 1.03) | 0.92 (0.82, 1.04) | 0.89 (0.78, 1.03) | 0.06              | 0.86 (0.73, 1.00)                                                            |
| <b>Nurses' Health Study I</b>               |                                |                   |                   |                   |                   |                                                                              |
| No. cases/person-years                      | 6,407/1,473,683                | 831/212,466       | 257/60,263        | 118/28,780        |                   |                                                                              |
| Age-adjusted Model 1                        | 1.00                           | 0.89 (0.83, 0.96) | 0.96 (0.85, 1.08) | 0.89 (0.76, 1.05) | 0.03              | 0.83 (0.70, 0.99)                                                            |
| Multivariable Model 2                       | 1.00                           | 0.99 (0.92, 1.07) | 1.08 (0.96, 1.22) | 1.03 (0.88, 1.21) | 0.47              | 1.07 (0.90, 1.26)                                                            |
| Multivariable Model 3                       | 1.00                           | 0.97 (0.89, 1.04) | 1.05 (0.93, 1.18) | 1.01 (0.86, 1.18) | 0.87              | 1.01 (0.85, 1.21)                                                            |
| <b>Pooled</b>                               |                                |                   |                   |                   |                   |                                                                              |
| Age-adjusted Model 1                        | 1.00                           | 0.89 (0.84, 0.94) | 0.84 (0.76, 0.92) | 0.80 (0.71, 0.90) | <0.0001           | 0.76 (0.67, 0.86)                                                            |
| Multivariable Model 2                       | 1.00                           | 0.97 (0.92, 1.02) | 1.02 (0.93, 1.11) | 0.88 (0.79, 0.98) | 0.39              | 0.95 (0.84, 1.07)                                                            |
| Multivariable Model 3                       | 1.00                           | 0.96 (0.91, 1.02) | 1.00 (0.91, 1.10) | 0.94 (0.83, 1.05) | 0.24              | 0.93 (0.82, 1.05)                                                            |
| <b>CHD‡</b>                                 |                                |                   |                   |                   |                   |                                                                              |
| <b>Health Professionals Follow-Up Study</b> |                                |                   |                   |                   |                   |                                                                              |
| No. cases/person-years                      | 3,872/703,191                  | 843/176,758       | 203/49,258        | 135/27,993        |                   |                                                                              |
| Age-adjusted Model 1                        | 1.00                           | 0.90 (0.83, 0.97) | 0.83 (0.73, 0.95) | 0.77 (0.66, 0.91) | <0.0001           | 0.69 (0.58, 0.83)                                                            |
| Multivariable Model 2                       | 1.00                           | 0.97 (0.90, 1.05) | 0.95 (0.83, 1.08) | 0.86 (0.73, 1.01) | 0.04              | 0.83 (0.70, 0.99)                                                            |
| Multivariable Model 3                       | 1.00                           | 0.96 (0.88, 1.04) | 0.94 (0.82, 1.08) | 0.87 (0.74, 1.03) | 0.06              | 0.84 (0.70, 1.01)                                                            |
| <b>Nurses' Health Study I</b>               |                                |                   |                   |                   |                   |                                                                              |
| No. cases/person-years                      | 3,530/1,475,581                | 436/212,727       | 114/60,357        | 52/28,818         |                   |                                                                              |
| Age-adjusted Model 1                        | 1.00                           | 0.82 (0.74, 0.91) | 0.85 (0.71, 1.01) | 0.75 (0.59, 0.95) | 0.004             | 0.63 (0.48, 0.81)                                                            |
| Multivariable Model 2                       | 1.00                           | 0.96 (0.86, 1.06) | 1.00 (0.84, 1.19) | 0.92 (0.72, 1.17) | 0.44              | 0.91 (0.71, 1.16)                                                            |
| Multivariable Model 3                       | 1.00                           | 0.94 (0.84, 1.04) | 0.98 (0.82, 1.17) | 0.91 (0.71, 1.15) | 0.31              | 0.87 (0.67, 1.13)                                                            |
| <b>Pooled</b>                               |                                |                   |                   |                   |                   |                                                                              |
| Age-adjusted Model 1                        | 1.00                           | 0.87 (0.82, 0.92) | 0.84 (0.75, 0.93) | 0.77 (0.67, 0.88) | <0.0001           | 0.67 (0.58, 0.77)                                                            |
| Multivariable Model 2                       | 1.00                           | 0.96 (0.91, 1.03) | 0.97 (0.87, 1.07) | 0.88 (0.77, 1.00) | 0.04              | 0.86 (0.74, 0.99)                                                            |
| Multivariable Model 3                       | 1.00                           | 0.95 (0.89, 1.01) | 0.96 (0.86, 1.07) | 0.88 (0.77, 1.01) | 0.03              | 0.85 (0.73, 0.99)                                                            |
| <b>Stroke§</b>                              |                                |                   |                   |                   |                   |                                                                              |
| <b>Health Professionals Follow-Up Study</b> |                                |                   |                   |                   |                   |                                                                              |
| No. cases/person-years                      | 1,204/704,059                  | 274/176,971       | 79/49,317         | 51/27,999         |                   |                                                                              |
| Age-adjusted Model 1                        | 1.00                           | 0.97 (0.85, 1.11) | 0.85 (0.67, 1.08) | 0.94 (0.72, 1.23) | 0.41              | 0.88 (0.65, 1.19)                                                            |
| Multivariable Model 2                       | 1.00                           | 0.99 (0.87, 1.14) | 0.89 (0.70, 1.12) | 0.99 (0.75, 1.29) | 0.69              | 0.94 (0.70, 1.27)                                                            |

|                               |                 |                   |                   |                   |      |                   |
|-------------------------------|-----------------|-------------------|-------------------|-------------------|------|-------------------|
| Multivariable Model 3         | 1.00            | 0.97 (0.84, 1.12) | 0.87 (0.68, 1.10) | 0.96 (0.73, 1.25) | 0.52 | 0.90 (0.66, 1.23) |
| <b>Nurses' Health Study I</b> |                 |                   |                   |                   |      |                   |
| No. cases/person-years        | 3,046/1,475,539 | 421/212,662       | 147/60,321        | 68/28,802         |      |                   |
| Age-adjusted Model 1          | 1.00            | 0.99 (0.89, 1.10) | 1.05 (0.89, 1.24) | 1.05 (0.85, 1.30) | 0.59 | 1.07 (0.85, 1.33) |
| Multivariable Model 2         | 1.00            | 1.04 (0.94, 1.16) | 1.12 (0.95, 1.32) | 1.14 (0.92, 1.40) | 0.11 | 1.21 (0.96, 1.51) |
| Multivariable Model 3         | 1.00            | 1.01 (0.91, 1.12) | 1.08 (0.91, 1.28) | 1.09 (0.88, 1.36) | 0.31 | 1.13 (0.89, 1.43) |
| <b>Pooled</b>                 |                 |                   |                   |                   |      |                   |
| Age-adjusted Model 1          | 1.00            | 0.98 (0.91, 1.07) | 0.98 (0.86, 1.12) | 1.01 (0.85, 1.19) | 0.95 | 0.99 (0.83, 1.19) |
| Multivariable Model 2         | 1.00            | 1.02 (0.94, 1.11) | 1.04 (0.90, 1.19) | 1.07 (0.91, 1.27) | 0.29 | 1.10 (0.92, 1.32) |
| Multivariable Model 3         | 1.00            | 0.99 (0.91, 1.08) | 1.01 (0.88, 1.15) | 1.04 (0.88, 1.23) | 0.67 | 1.04 (0.86, 1.26) |

\* 1 serving avocado = ½ avocado; ½ serving = ¼ avocado. † CVD = cardiovascular disease: Fatal and nonfatal myocardial infarction plus fatal and nonfatal stroke. ‡ CHD = coronary heart disease: Fatal and nonfatal myocardial infarction. § Fatal and nonfatal stroke. Model 2 was adjusted for: age (years); race (White or other [Black, American Indian or Alaskan Native, Asian, Native Hawaiian or Other Pacific Islander]); ancestry (Southern European/Mediterranean, other Caucasian/Scandinavian, other); alcohol intake (0, 0.1 to 4.9, 5.0 to 9.9, 10.0 to 14.9, and ≥15.0 g/day); smoking status (never, former, current smoker 1 to 14 cigarettes per day, 15 to 24 cigarettes per day; or ≥25 cigarettes per day); physical activity (<3.0, 3.0 to 8.9, 9.0 to 17.9, 18.0 to 26.9, ≥27.0 MET-h/week); family history of diabetes (yes, no); family history of myocardial infarction (yes, no); family history of cancer (yes, no); baseline diabetes mellitus (yes, no); baseline hypertension or antihypertensive medication use (yes, no); baseline hypercholesterolemia or cholesterol-lowering medication use (yes, no); multivitamin use (yes, no); aspirin use (yes, no); in women, postmenopausal status and menopausal hormone use (premenopausal, postmenopausal [no, past, or current hormone use]); total energy intake (kcal/day); and BMI kg/m<sup>2</sup>. Model 3 was additionally adjusted for red and processed meat, fruits and vegetables (excluding avocado), nuts, soda (caloric and low or noncaloric), whole grains, eggs, tortilla (whole and chips), breads, cheese intakes (in quintiles; tortilla in tertiles in NHS), and trans-fat. Results were pooled with the use of the fixed-effects model.

**Table S8. Risk of Cardiovascular Events According to Categories of the Average Intake\* of the Last Two Dietary Measurements of Avocado in Two Large US Cohorts.**

|                                             | HR (95% CI)                    |                     |                   |                   | P value for trend | HR (95% CI) for 1/2 serving (1/4 avocado)-Increase in Avocado Intake per day |
|---------------------------------------------|--------------------------------|---------------------|-------------------|-------------------|-------------------|------------------------------------------------------------------------------|
|                                             | Never or less than 1 per month | 1-3 times per month | 1 per week        | ≥2 per week       |                   |                                                                              |
| <b>CVD<sup>†</sup></b>                      |                                |                     |                   |                   |                   |                                                                              |
| <b>Health Professionals Follow-Up Study</b> |                                |                     |                   |                   |                   |                                                                              |
| No. cases/person-years                      | 4,827/657,003                  | 1,277/205,874       | 328/58,796        | 229/34,077        |                   |                                                                              |
| Age-adjusted Model 1                        | 1.00                           | 0.92 (0.86, 0.97)   | 0.80 (0.72, 0.90) | 0.82 (0.72, 0.94) | <0.0001           | 0.73 (0.63, 0.85)                                                            |
| Multivariable Model 2                       | 1.00                           | 0.98 (0.92, 1.04)   | 0.89 (0.80, 1.00) | 0.90 (0.78, 1.02) | 0.03              | 0.85 (0.73, 0.99)                                                            |
| Multivariable Model 3                       | 1.00                           | 0.93 (0.87, 0.99)   | 0.84 (0.75, 0.94) | 0.84 (0.74, 0.97) | 0.0008            | 0.77 (0.66, 0.90)                                                            |
| <b>Nurses' Health Study I</b>               |                                |                     |                   |                   |                   |                                                                              |
| No. cases/person-years                      | 6,245/1,429,788                | 974/251,487         | 252/57,717        | 142/36,200        |                   |                                                                              |
| Age-adjusted Model 1                        | 1.00                           | 0.88 (0.82, 0.94)   | 0.95 (0.84, 1.08) | 0.74 (0.63, 0.87) | <0.0001           | 0.64 (0.53, 0.78)                                                            |
| Multivariable Model 2                       | 1.00                           | 0.98 (0.91, 1.05)   | 1.08 (0.95, 1.22) | 0.86 (0.72, 1.01) | 0.12              | 0.86 (0.71, 1.04)                                                            |
| Multivariable Model 3                       | 1.00                           | 0.94 (0.88, 1.01)   | 1.03 (0.91, 1.17) | 0.83 (0.70, 0.98) | 0.02              | 0.79 (0.65, 0.97)                                                            |
| <b>Pooled</b>                               |                                |                     |                   |                   |                   |                                                                              |
| Age-adjusted Model 1                        | 1.00                           | 0.90 (0.86, 0.94)   | 0.87 (0.80, 0.94) | 0.79 (0.71, 0.87) | <0.0001           | 0.70 (0.62, 0.78)                                                            |
| Multivariable Model 2                       | 1.00                           | 0.98 (0.93, 1.02)   | 0.97 (0.89, 1.06) | 0.88 (0.79, 0.98) | 0.009             | 0.85 (0.76, 0.96)                                                            |
| Multivariable Model 3                       | 1.00                           | 0.93 (0.89, 0.98)   | 0.92 (0.84, 1.00) | 0.84 (0.75, 0.93) | <0.0001           | 0.75 (0.66, 0.86)                                                            |
| <b>CHD<sup>‡</sup></b>                      |                                |                     |                   |                   |                   |                                                                              |
| <b>Health Professionals Follow-Up Study</b> |                                |                     |                   |                   |                   |                                                                              |
| No. cases/person-years                      | 3,694/658,045                  | 956/206,151         | 240/58,865        | 163/34,139        |                   |                                                                              |
| Age-adjusted Model 1                        | 1.00                           | 0.90 (0.84, 0.96)   | 0.77 (0.68, 0.88) | 0.77 (0.66, 0.90) | <0.0001           | 0.66 (0.55, 0.79)                                                            |
| Multivariable Model 2                       | 1.00                           | 0.97 (0.90, 1.04)   | 0.88 (0.77, 1.00) | 0.85 (0.72, 0.99) | 0.01              | 0.80 (0.67, 0.95)                                                            |
| Multivariable Model 3                       | 1.00                           | 0.92 (0.86, 0.99)   | 0.82 (0.72, 0.94) | 0.80 (0.68, 0.94) | 0.0004            | 0.72 (0.60, 0.87)                                                            |
| <b>Nurses' Health Study I</b>               |                                |                     |                   |                   |                   |                                                                              |
| No. cases/person-years                      | 3,448/1,431,618                | 505/251,810         | 113/57,811        | 66/36,244         |                   |                                                                              |
| Age-adjusted Model 1                        | 1.00                           | 0.83 (0.76, 0.91)   | 0.78 (0.64, 0.94) | 0.64 (0.50, 0.82) | <0.0001           | 0.48 (0.35, 0.64)                                                            |
| Multivariable Model 2                       | 1.00                           | 0.97 (0.88, 1.07)   | 0.93 (0.77, 1.13) | 0.79 (0.62, 1.01) | 0.04              | 0.74 (0.56, 0.98)                                                            |
| Multivariable Model 3                       | 1.00                           | 0.93 (0.85, 1.03)   | 0.90 (0.74, 1.08) | 0.77 (0.60, 0.98) | 0.01              | 0.69 (0.52, 0.93)                                                            |
| <b>Pooled</b>                               |                                |                     |                   |                   |                   |                                                                              |
| Age-adjusted Model 1                        | 1.00                           | 0.87 (0.82, 0.92)   | 0.77 (0.70, 0.86) | 0.73 (0.64, 0.83) | <0.0001           | 0.61 (0.52, 0.71)                                                            |
| Multivariable Model 2                       | 1.00                           | 0.97 (0.92, 1.03)   | 0.89 (0.80, 1.00) | 0.83 (0.73, 0.95) | 0.001             | 0.78 (0.68, 0.91)                                                            |
| Multivariable Model 3                       | 1.00                           | 0.92 (0.87, 0.98)   | 0.85 (0.76, 0.94) | 0.79 (0.69, 0.91) | <0.0001           | 0.71 (0.61, 0.83)                                                            |
| <b>Stroke<sup>§</sup></b>                   |                                |                     |                   |                   |                   |                                                                              |
| <b>Health Professionals Follow-Up Study</b> |                                |                     |                   |                   |                   |                                                                              |
| No. cases/person-years                      | 1,133/658,877                  | 321/206,398         | 88/58,929         | 66/34,142         |                   |                                                                              |
| Age-adjusted Model 1                        | 1.00                           | 0.98 (0.86, 1.11)   | 0.90 (0.73, 1.12) | 0.99 (0.77, 1.27) | 0.71              | 0.95 (0.72, 1.25)                                                            |

|                               |                 |                   |                   |                   |      |                   |
|-------------------------------|-----------------|-------------------|-------------------|-------------------|------|-------------------|
| Multivariable Model 2         | 1.00            | 1.00 (0.88, 1.13) | 0.94 (0.76, 1.17) | 1.04 (0.81, 1.33) | 0.93 | 1.01 (0.77, 1.34) |
| Multivariable Model 3         | 1.00            | 0.95 (0.84, 1.08) | 0.88 (0.71, 1.10) | 0.96 (0.75, 1.25) | 0.54 | 0.91 (0.68, 1.22) |
| <b>Nurses' Health Study I</b> |                 |                   |                   |                   |      |                   |
| No. cases/person-years        | 2,963/1,431,588 | 497/251,730       | 144/57,776        | 78/36,230         |      |                   |
| Age-adjusted Model 1          | 1.00            | 0.95 (0.86, 1.04) | 1.14 (0.96, 1.35) | 0.84 (0.69, 1.05) | 0.18 | 0.84 (0.64, 1.08) |
| Multivariable Model 2         | 1.00            | 1.00 (0.90, 1.10) | 1.21 (1.02, 1.43) | 0.91 (0.72, 1.14) | 0.78 | 0.96 (0.74, 1.25) |
| Multivariable Model 3         | 1.00            | 0.96 (0.87, 1.06) | 1.16 (0.97, 1.37) | 0.86 (0.69, 1.09) | 0.33 | 0.87 (0.67, 1.14) |
| <b>Pooled</b>                 |                 |                   |                   |                   |      |                   |
| Age-adjusted Model 1          | 1.00            | 0.96 (0.89, 1.03) | 1.04 (0.91, 1.19) | 0.90 (0.76, 1.07) | 0.21 | 0.89 (0.73, 1.07) |
| Multivariable Model 2         | 1.00            | 1.00 (0.92, 1.08) | 1.10 (0.96, 1.26) | 0.96 (0.81, 1.14) | 0.88 | 0.99 (0.82, 1.19) |
| Multivariable Model 3         | 1.00            | 0.96 (0.89, 1.04) | 1.04 (0.91, 1.20) | 0.91 (0.76, 1.08) | 0.26 | 0.89 (0.73, 1.09) |

\* 1 serving avocado = ½ avocado; ½ serving = ¼ avocado. † CVD = cardiovascular disease: Fatal and nonfatal myocardial infarction plus fatal and nonfatal stroke. ‡ CHD = coronary heart disease: Fatal and nonfatal myocardial infarction. § Fatal and nonfatal stroke.

Model 2 was adjusted for: age (years); race (White or other [Black, American Indian or Alaskan Native, Asian, Native Hawaiian or Other Pacific Islander]); ancestry (Southern European/Mediterranean, other Caucasian/Scandinavian, other); alcohol intake (0, 0.1 to 4.9, 5.0 to 9.9, 10.0 to 14.9, and ≥15.0 g/day); smoking status (never, former, current smoker 1 to 14 cigarettes per day, 15 to 24 cigarettes per day; or ≥25 cigarettes per day); physical activity (<3.0, 3.0 to 8.9, 9.0 to 17.9, 18.0 to 26.9, ≥27.0 MET-h/week); family history of diabetes (yes, no); family history of myocardial infarction (yes, no); family history of cancer (yes, no); baseline diabetes mellitus (yes, no); baseline hypertension or antihypertensive medication use (yes, no); baseline hypercholesterolemia or cholesterol-lowering medication use (yes, no); multivitamin use (yes, no); aspirin use (yes, no); in women, postmenopausal status and menopausal hormone use (premenopausal, postmenopausal [no, past, or current hormone use]); total energy intake (kcal/day); and BMI kg/m<sup>2</sup>. Model 3 was additionally adjusted for red and processed meat, fruits and vegetables (excluding avocado), nuts, soda (caloric or low or noncaloric), whole grains, eggs, tortilla (whole and chips), breads, cheese intakes (in quintiles; tortilla in tertiles in NHS), and trans-fat. Results were pooled with the use of the fixed-effects model.

**Table S9. Risk of Cardiovascular Events According to Categories of the Average Intake\* adjusting for MUFA intake in Two Large US Cohorts.**

|                                             | HR (95% CI)                    |                     |                   |                   | P value for trend | HR (95% CI) for 1/2 serving (1/4 avocado)-Increase in Avocado Intake per day |
|---------------------------------------------|--------------------------------|---------------------|-------------------|-------------------|-------------------|------------------------------------------------------------------------------|
|                                             | Never or less than 1 per month | 1-3 times per month | 1 per week        | ≥2 per week       |                   |                                                                              |
| <b>CVD†</b>                                 |                                |                     |                   |                   |                   |                                                                              |
| <b>Health Professionals Follow-Up Study</b> |                                |                     |                   |                   |                   |                                                                              |
| No. cases/person-years                      | 5,076/702,080                  | 1,117/176,523       | 282/49,201        | 186/27,947        |                   |                                                                              |
| Age-adjusted Model 1                        | 1.00                           | 0.95 (0.89, 1.01)   | 0.83 (0.74, 0.94) | 0.82 (0.71, 0.95) | 0.0004            | 0.75 (0.64, 0.88)                                                            |
| Multivariable Model 2                       | 1.00                           | 1.00 (0.93, 1.07)   | 0.92 (0.81, 1.04) | 0.88 (0.76, 1.03) | 0.06              | 0.86 (0.73, 1.01)                                                            |
| Multivariable Model 3                       | 1.00                           | 0.92 (0.86, 0.99)   | 0.84 (0.74, 0.95) | 0.81 (0.69, 0.94) | 0.0003            | 0.73 (0.62, 0.87)                                                            |
| <b>Nurses' Health Study I</b>               |                                |                     |                   |                   |                   |                                                                              |
| No. cases/person-years                      | 6,407/1,473,683                | 831/212,466         | 257/60,263        | 118/28,780        |                   |                                                                              |
| Age-adjusted Model 1                        | 1.00                           | 0.93 (0.86, 1.00)   | 0.93 (0.82, 1.05) | 0.79 (0.66, 0.95) | 0.002             | 0.74 (0.61, 0.89)                                                            |
| Multivariable Model 2                       | 1.00                           | 1.02 (0.95, 1.10)   | 1.05 (0.93, 1.19) | 0.91 (0.76, 1.10) | 0.67              | 0.96 (0.80, 1.16)                                                            |
| Multivariable Model 3                       | 1.00                           | 0.99 (0.92, 1.07)   | 1.03 (0.91, 1.17) | 0.92 (0.76, 1.10) | 0.48              | 0.93 (0.77, 1.13)                                                            |
| <b>Pooled</b>                               |                                |                     |                   |                   |                   |                                                                              |
| Age-adjusted Model 1                        | 1.00                           | 0.94 (0.89, 0.98)   | 0.88 (0.81, 0.96) | 0.81 (0.72, 0.91) | <0.0001           | 0.74 (0.66, 0.84)                                                            |
| Multivariable Model 2                       | 1.00                           | 1.01 (0.96, 1.06)   | 0.98 (0.90, 1.07) | 0.90 (0.80, 1.00) | 0.09              | 0.90 (0.80, 1.02)                                                            |
| Multivariable Model 3                       | 1.00                           | 0.95 (0.91, 1.00)   | 0.93 (0.85, 1.01) | 0.85 (0.75, 0.95) | 0.001             | 0.81 (0.71, 0.92)                                                            |
| <b>CHD‡</b>                                 |                                |                     |                   |                   |                   |                                                                              |
| <b>Health Professionals Follow-Up Study</b> |                                |                     |                   |                   |                   |                                                                              |
| No. cases/person-years                      | 3,872/703,245                  | 843/176,760         | 203/49,258        | 135/27,995        |                   |                                                                              |
| Age-adjusted Model 1                        | 1.00                           | 0.93 (0.86, 1.00)   | 0.79 (0.68, 0.91) | 0.78 (0.66, 0.93) | 0.0001            | 0.69 (0.57, 0.83)                                                            |
| Multivariable Model 2                       | 1.00                           | 0.99 (0.92, 1.07)   | 0.88 (0.76, 1.02) | 0.85 (0.71, 1.01) | 0.03              | 0.81 (0.67, 0.97)                                                            |
| Multivariable Model 3                       | 1.00                           | 0.92 (0.85, 0.99)   | 0.81 (0.70, 0.93) | 0.78 (0.65, 0.93) | 0.0002            | 0.69 (0.57, 0.84)                                                            |
| <b>Nurses' Health Study I</b>               |                                |                     |                   |                   |                   |                                                                              |
| No. cases/person-years                      | 3,530/1,475,581                | 436/212,727         | 114/60,357        | 52/28,818         |                   |                                                                              |
| Age-adjusted Model 1                        | 1.00                           | 0.88 (0.80, 0.97)   | 0.76 (0.63, 0.91) | 0.65 (0.49, 0.86) | <0.0001           | 0.53 (0.40, 0.70)                                                            |
| Multivariable Model 2                       | 1.00                           | 1.02 (0.92, 1.13)   | 0.91 (0.75, 1.09) | 0.80 (0.60, 1.05) | 0.09              | 0.79 (0.60, 1.03)                                                            |
| Multivariable Model 3                       | 1.00                           | 0.98 (0.88, 1.09)   | 0.89 (0.73, 1.07) | 0.81 (0.61, 1.06) | 0.07              | 0.76 (0.57, 1.02)                                                            |
| <b>Pooled</b>                               |                                |                     |                   |                   |                   |                                                                              |
| Age-adjusted Model 1                        | 1.00                           | 0.91 (0.86, 0.97)   | 0.78 (0.69, 0.87) | 0.74 (0.64, 0.86) | <0.0001           | 0.63 (0.54, 0.74)                                                            |
| Multivariable Model 2                       | 1.00                           | 1.00 (0.94, 1.06)   | 0.89 (0.79, 1.00) | 0.83 (0.72, 0.96) | 0.005             | 0.80 (0.69, 0.94)                                                            |
| Multivariable Model 3                       | 1.00                           | 0.94 (0.88, 1.00)   | 0.83 (0.74, 0.94) | 0.79 (0.68, 0.91) | <0.0001           | 0.71 (0.61, 0.84)                                                            |
| <b>Stroke§</b>                              |                                |                     |                   |                   |                   |                                                                              |
| <b>Health Professionals Follow-Up Study</b> |                                |                     |                   |                   |                   |                                                                              |
| No. cases/person-years                      | 1,204/704,059                  | 274/176,971         | 79/49,317         | 51/27,999         |                   |                                                                              |
| Age-adjusted Model 1                        | 1.00                           | 0.99 (0.87, 1.13)   | 0.99 (0.78, 1.24) | 0.96 (0.72, 1.27) | 0.73              | 0.95 (0.70, 1.29)                                                            |
| Multivariable Model 2                       | 1.00                           | 1.01 (0.89, 1.16)   | 1.03 (0.82, 1.30) | 1.00 (0.75, 1.32) | 0.94              | 1.01 (0.75, 1.37)                                                            |
| Multivariable Model 3                       | 1.00                           | 0.96 (0.83, 1.10)   | 0.95 (0.75, 1.20) | 0.90 (0.67, 1.20) | 0.38              | 0.87 (0.63, 1.19)                                                            |

| <b>Nurses' Health Study I</b> | 3,046/1,475,539 | 421/212,662       | 147/60,321        | 68/28,802         |      |                   |
|-------------------------------|-----------------|-------------------|-------------------|-------------------|------|-------------------|
| No. cases/person-years        |                 |                   |                   |                   |      |                   |
| Age-adjusted Model 1          | 1.00            | 0.99 (0.89, 1.10) | 1.11 (0.94, 1.31) | 0.94 (0.74, 1.19) | 0.93 | 0.99 (0.77, 1.26) |
| Multivariable Model 2         | 1.00            | 1.04 (0.93, 1.15) | 1.18 (1.00, 1.40) | 1.02 (0.80, 1.30) | 0.34 | 1.13 (0.88, 1.44) |
| Multivariable Model 3         | 1.00            | 1.02 (0.91, 1.13) | 1.16 (0.98, 1.38) | 1.02 (0.80, 1.31) | 0.45 | 1.11 (0.85, 1.43) |
| <b>Pooled</b>                 |                 |                   |                   |                   |      |                   |
| Age-adjusted Model 1          | 1.00            | 0.99 (0.91, 1.07) | 1.06 (0.93, 1.22) | 0.94 (0.79, 1.13) | 0.78 | 0.97 (0.80, 1.18) |
| Multivariable Model 2         | 1.00            | 1.03 (0.95, 1.11) | 1.13 (0.98, 1.29) | 1.01 (0.84, 1.21) | 0.43 | 1.08 (0.89, 1.31) |
| Multivariable Model 3         | 1.00            | 0.99 (0.91, 1.08) | 1.08 (0.94, 1.24) | 0.97 (0.80, 1.17) | 0.97 | 1.00 (0.82, 1.23) |

\* 1 serving avocado = ½ avocado; ½ serving = ¼ avocado. † CVD = cardiovascular disease: Fatal and nonfatal myocardial infarction plus fatal and nonfatal stroke. ‡ CHD = coronary heart disease: Fatal and nonfatal myocardial infarction. § Fatal and nonfatal stroke.

Model 2 was adjusted for: age (years); race (White or other [Black, American Indian or Alaskan Native, Asian, Native Hawaiian or Other Pacific Islander]); ancestry (Southern European/Mediterranean, other Caucasian/Scandinavian, other); alcohol intake (0, 0.1 to 4.9, 5.0 to 9.9, 10.0 to 14.9, and ≥15.0 g/day); smoking status (never, former, current smoker 1 to 14 cigarettes per day, 15 to 24 cigarettes per day; or ≥25 cigarettes per day); physical activity (<3.0, 3.0 to 8.9, 9.0 to 17.9, 18.0 to 26.9, ≥27.0 MET-h/week); family history of diabetes (yes, no); family history of myocardial infarction (yes, no); family history of cancer (yes, no); baseline diabetes mellitus (yes, no); baseline hypertension or antihypertensive medication use (yes, no); baseline hypercholesterolemia or cholesterol-lowering medication use (yes, no); multivitamin use (yes, no); aspirin use (yes, no); in women, postmenopausal status and menopausal hormone use (premenopausal, postmenopausal [no, past, or current hormone use]); total energy intake (kcal/day); and BMI kg/m<sup>2</sup>. Model 3 was additionally adjusted for red and processed meat, fruits and vegetables (excluding avocado), nuts, soda (caloric and low or noncaloric), whole grains, eggs, tortilla (whole and chips), breads, cheese intakes (in quintiles; tortilla in tertiles in NHS); trans-fat; and monounsaturated fat. Results were pooled with the use of the fixed-effects model.



**Table S10. Risk of Cardiovascular Events According to Cumulative Average Intake\* of Avocado in Two Large US Cohorts.**

|                                             | HR (95% CI)                    |                     |                   |                   | P value for trend | HR (95% CI) for 1/2 serving (1/4 avocado)-Increase in Avocado Intake per day |
|---------------------------------------------|--------------------------------|---------------------|-------------------|-------------------|-------------------|------------------------------------------------------------------------------|
|                                             | Never or less than 1 per month | 1-3 times per month | 1 per week        | ≥2 per week       |                   |                                                                              |
| <b>CVD<sup>†</sup></b>                      |                                |                     |                   |                   |                   |                                                                              |
| <b>Health Professionals Follow-Up Study</b> |                                |                     |                   |                   |                   |                                                                              |
| No. cases/person-years                      | 4,426/607,620                  | 1,636/253,769       | 378/65,362        | 221/28,998        |                   |                                                                              |
| Age-adjusted Model 1                        | 1.00                           | 0.89 (0.84, 0.95)   | 0.78 (0.70, 0.86) | 0.88 (0.76, 1.00) | <0.0001           | 0.63 (0.50, 0.79)                                                            |
| Multivariable Model 2                       | 1.00                           | 0.96 (0.90, 1.01)   | 0.85 (0.77, 0.95) | 0.94 (0.82, 1.08) | 0.03              | 0.79 (0.63, 0.98)                                                            |
| Multivariable Model 3                       | 1.00                           | 1.00 (0.94, 1.06)   | 0.90 (0.81, 1.00) | 1.00 (0.87, 1.15) | 0.51              | 0.93 (0.74, 1.16)                                                            |
| <b>Nurses' Health Study I</b>               |                                |                     |                   |                   |                   |                                                                              |
| No. cases/person-years                      | 5,921/1,377,071                | 1,259/298,057       | 279/63,575        | 154/36,490        |                   |                                                                              |
| Age-adjusted Model 1                        | 1.00                           | 0.89 (0.84, 0.95)   | 0.91 (0.80, 1.02) | 0.77 (0.65, 0.90) | <0.0001           | 0.58 (0.45, 0.74)                                                            |
| Multivariable Model 2                       | 1.00                           | 1.00 (0.93, 1.06)   | 1.03 (0.91, 1.16) | 0.87 (0.74, 1.02) | 0.19              | 0.85 (0.66, 1.08)                                                            |
| Multivariable Model 3                       | 1.00                           | 0.94 (0.80, 1.10)   | 0.97 (0.80, 1.17) | 0.82 (0.66, 1.03) | 0.14              | 0.77 (0.54, 1.09)                                                            |
| <b>Pooled</b>                               |                                |                     |                   |                   |                   |                                                                              |
| Age-adjusted Model 1                        | 1.00                           | 0.89 (0.86, 0.93)   | 0.83 (0.77, 0.90) | 0.83 (0.75, 0.92) | <0.0001           | 0.60 (0.51, 0.71)                                                            |
| Multivariable Model 2                       | 1.00                           | 0.97 (0.93, 1.02)   | 0.93 (0.85, 1.00) | 0.91 (0.82, 1.01) | 0.01              | 0.81 (0.69, 0.96)                                                            |
| Multivariable Model 3                       | 1.00                           | 0.99 (0.94, 1.05)   | 0.91 (0.83, 1.00) | 0.95 (0.84, 1.07) | 0.18              | 0.88 (0.73, 1.06)                                                            |
| <b>CHD<sup>‡</sup></b>                      |                                |                     |                   |                   |                   |                                                                              |
| <b>Health Professionals Follow-Up Study</b> |                                |                     |                   |                   |                   |                                                                              |
| No. cases/person-years                      | 3,394/608,581                  | 1,224/254,122       | 272/65,450        | 163/29,046        |                   |                                                                              |
| Age-adjusted Model 1                        | 1.00                           | 0.88 (0.82, 0.94)   | 0.73 (0.65, 0.83) | 0.85 (0.72, 0.99) | <0.0001           | 0.66 (0.43, 0.73)                                                            |
| Multivariable Model 2                       | 1.00                           | 0.95 (0.89, 1.01)   | 0.82 (0.72, 0.93) | 0.91 (0.78, 1.07) | 0.02              | 0.73 (0.56, 0.94)                                                            |
| Multivariable Model 3                       | 1.00                           | 0.99 (0.93, 1.06)   | 0.87 (0.76, 0.98) | 0.97 (0.83, 1.14) | 0.27              | 0.86 (0.66, 1.12)                                                            |
| <b>Nurses' Health Study I</b>               |                                |                     |                   |                   |                   |                                                                              |
| No. cases/person-years                      | 3,290/1,378,803                | 640/298,471         | 134/63,673        | 68/36,536         |                   |                                                                              |
| Age-adjusted Model 1                        | 1.00                           | 0.83 (0.76, 0.90)   | 0.80 (0.67, 0.95) | 0.63 (0.49, 0.80) | <0.0001           | 0.36 (0.25, 0.52)                                                            |
| Multivariable Model 2                       | 1.00                           | 0.97 (0.89, 1.06)   | 0.96 (0.81, 1.14) | 0.75 (0.59, 0.96) | 0.02              | 0.66 (0.46, 0.94)                                                            |
| Multivariable Model 3                       | 1.00                           | 0.91 (0.74, 1.13)   | 0.86 (0.66, 1.08) | 0.68 (0.50, 0.93) | 0.02              | 0.54 (0.32, 0.91)                                                            |
| <b>Pooled</b>                               |                                |                     |                   |                   |                   |                                                                              |
| Age-adjusted Model 1                        | 1.00                           | 0.86 (0.82, 0.90)   | 0.75 (0.68, 0.83) | 0.77 (0.68, 0.88) | <0.0001           | 0.48 (0.39, 0.60)                                                            |
| Multivariable Model 2                       | 1.00                           | 0.96 (0.91, 1.01)   | 0.86 (0.78, 0.96) | 0.86 (0.75, 0.98) | 0.001             | 0.70 (0.57, 0.87)                                                            |
| Multivariable Model 3                       | 1.00                           | 0.98 (0.92, 1.05)   | 0.86 (0.77, 0.97) | 0.90 (0.78, 1.04) | 0.04              | 0.79 (0.62, 0.99)                                                            |
| <b>Stroke<sup>§</sup></b>                   |                                |                     |                   |                   |                   |                                                                              |
| <b>Health Professionals Follow-Up Study</b> |                                |                     |                   |                   |                   |                                                                              |
| No. cases/person-years                      | 1,032/609,381                  | 412/254,394         | 106/65,511        | 58/29,060         |                   |                                                                              |
| Age-adjusted Model 1                        | 1.00                           | 0.95 (0.85, 1.07)   | 0.92 (0.75, 1.13) | 0.98 (0.75, 1.27) | 0.56              | 0.88 (0.57, 1.36)                                                            |
| Multivariable Model 2                       | 1.00                           | 0.98 (0.87, 1.10)   | 0.95 (0.78, 1.17) | 1.03 (0.79, 1.34) | 0.95              | 0.99 (0.64, 1.52)                                                            |
| Multivariable Model 3                       | 1.00                           | 1.02 (0.90, 1.14)   | 1.00 (0.82, 1.23) | 1.10 (0.84, 1.44) | 0.52              | 1.16 (0.75, 1.79)                                                            |

**Nurses' Health Study I**

|                        |                |                   |                   |                   |      |                   |
|------------------------|----------------|-------------------|-------------------|-------------------|------|-------------------|
| No. cases/person-years | 2,7941,378,805 | 64/298,357        | 149/63,642        | 90/36,519         |      |                   |
| Age-adjusted Model 1   | 1.00           | 0.96 (0.88, 1.05) | 1.01 (0.86, 1.20) | 0.93 (0.75, 1.15) | 0.45 | 0.88 (0.64, 1.22) |
| Multivariable Model 2  | 1.00           | 1.02 (0.93, 1.11) | 1.08 (0.91, 1.27) | 0.99 (0.80, 1.23) | 0.74 | 1.06 (0.76, 1.47) |
| Multivariable Model 3  | 1.00           | 1.06 (0.84, 1.33) | 1.16 (0.88, 1.51) | 1.07 (0.79, 1.45) | 0.84 | 1.05 (0.66, 1.68) |
| <b>Pooled</b>          |                |                   |                   |                   |      |                   |
| Age-adjusted Model 1   | 1.00           | 0.96 (0.90, 1.03) | 0.97 (0.86, 1.11) | 0.95 (0.80, 1.12) | 0.34 | 0.88 (0.68, 1.14) |
| Multivariable Model 2  | 1.00           | 1.00 (0.93, 1.07) | 1.03 (0.90, 1.17) | 1.01 (0.85, 1.19) | 0.82 | 1.03 (0.79, 1.34) |
| Multivariable Model 3  | 1.00           | 1.02 (0.92, 1.14) | 1.06 (0.90, 1.24) | 1.09 (0.89, 1.33) | 0.54 | 1.11 (0.80, 1.52) |

\* 1 serving avocado = ½ avocado; ½ serving = ¼ avocado. † CVD = cardiovascular disease: Fatal and nonfatal myocardial infarction plus fatal and nonfatal stroke. ‡ CHD = coronary heart disease: Fatal and nonfatal myocardial infarction. § Fatal and nonfatal stroke.

Model 2 was adjusted for: age (years); race (White or other [Black, American Indian or Alaskan Native, Asian, Native Hawaiian or Other Pacific Islander]); ancestry (Southern European/Mediterranean, other Caucasian/Scandinavian, other); alcohol intake (0, 0.1 to 4.9, 5.0 to 9.9, 10.0 to 14.9, and ≥15.0 g/day); smoking status (never, former, current smoker 1 to 14 cigarettes per day, 15 to 24 cigarettes per day; or ≥25 cigarettes per day); physical activity (<3.0, 3.0 to 8.9, 9.0 to 17.9, 18.0 to 26.9, ≥27.0 MET-h/week); family history of diabetes (yes, no); family history of myocardial infarction (yes, no); family history of cancer (yes, no); baseline diabetes mellitus (yes, no); baseline hypertension or antihypertensive medication use (yes, no); baseline hypercholesterolemia or cholesterol-lowering medication use (yes, no); multivitamin use (yes, no); aspirin use (yes, no); in women, postmenopausal status and menopausal hormone use (premenopausal, postmenopausal [no, past, or current hormone use]); total energy intake (kcal/day); and BMI kg/m<sup>2</sup>. Model 3 was additionally adjusted for red and processed meat, fruits and vegetables (excluding avocado), nuts, soda (caloric or low or noncaloric), whole grains, eggs, tortilla (whole and chips), breads, cheese intakes (in quintiles; tortilla in tertiles in NHS), and trans-fat. Results were pooled with the use of the fixed-effects model.

### Cardiovascular Disease

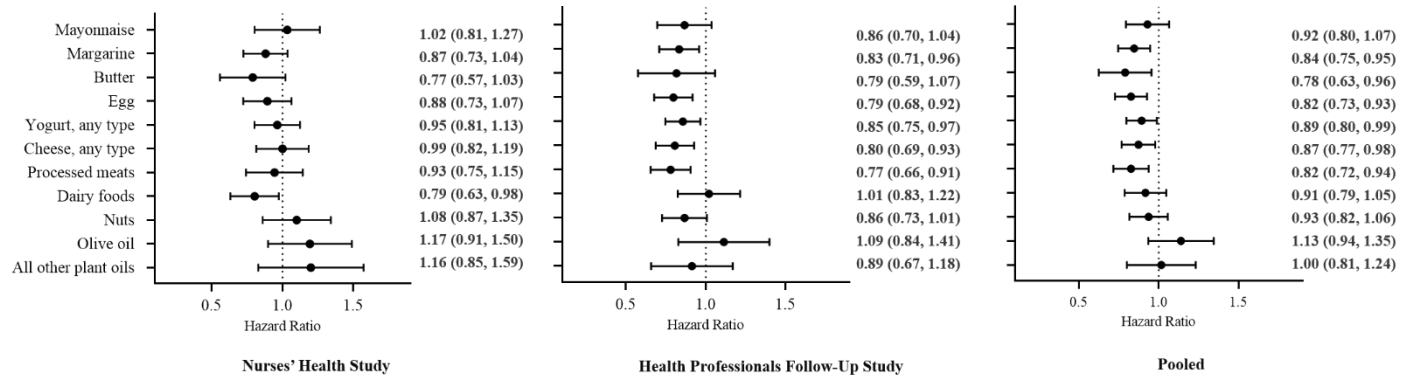

### Coronary Heart Disease

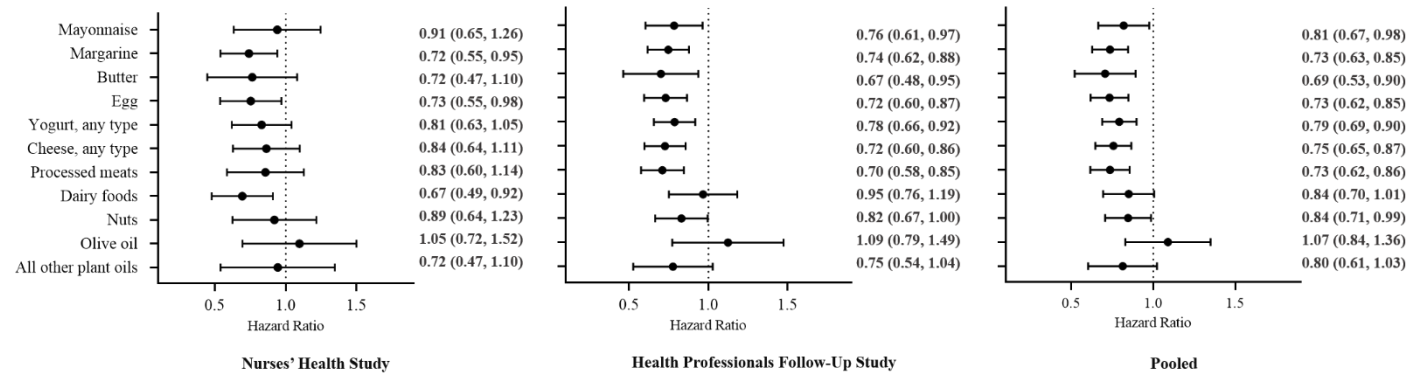

### Stroke

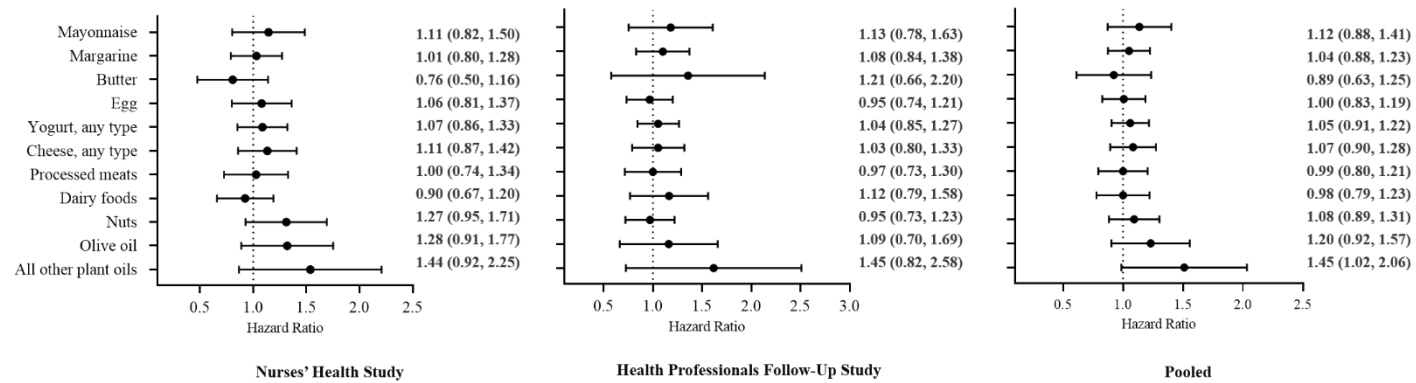

**Figure S1. Hazard Ratios for Cardiovascular Events Associated with Substitution of Half A Serving of Avocado for Equivalent Amounts of Other Fat-Containing Food Sources in Two Large US Cohorts.** Nurses' Health Study, Health Professional Follow-Up Study, and pooled hazard ratios (HRs) for cardiovascular disease, coronary heart disease, and stroke associated with substitution of ½ serving/day (1/4 avocado) of avocado for equivalent amounts of other fat-containing foods. Multivariate-adjusted models were adjusted for the following: age (years); race (White or other [Black, American Indian or Alaskan Native, Asian, Native Hawaiian or Other Pacific Islander]); ancestry (Southern European/Mediterranean, other Caucasian/Scandinavian, all other); alcohol intake (0, 0.1 to 4.9, 5.0 to 9.9, 10.0 to 14.9, and ≥15.0 g/day); smoking status (never, former, current smoker 1 to 14 cigarettes per day, 15 to 24 cigarettes per day; or ≥2 cigarettes per day); physical activity (<3.0, 3.0 to 8.9, 9.0 to 17.9, 18.0 to 26.9, ≥27.0 MET-h/week); family history of diabetes (yes, no); family history of myocardial infarction (yes, no); family history of cancer (yes, no); baseline diabetes mellitus (yes, no); baseline hypertension or antihypertensive medication use (yes, no); baseline hypercholesterolemia or cholesterol-lowering medication use (yes, no); multivitamin use (yes, no); aspirin use (yes, no); postmenopausal status and menopausal hormone use (premenopausal, postmenopausal [no, past, or current hormone use]), only in women; total energy intake (kcal/day); body mass index (kg/m<sup>2</sup>, continuous), red and processed meat, fruits and vegetables (excluding avocado), nuts, soda (caloric and low or noncaloric), whole grains, eggs, tortilla (whole and chips), breads, cheese intakes (all in quintiles; tortillas in tertiles in NHS); trans-fat, and mutually adjusted for other types of fat-containing foods. Results were pooled with the use of the fixed-effects model. Horizontal lines represent 95% confidence intervals (CIs).
